# Supplementary material for: Experimental evidence for delayed post-conflict management behaviour in wild dwarf mongooses
Source: eLife. 2021 Nov 2;10:e69196. doi: 10.7554/eLife.69196 (PMC8562999; doi:10.7554/eLife.69196)
Supplement: Figure 2—source data 1. [file elife-69196-fig2-data1.xlsx]

## Sheet: Figure 2a
Individual	Treatment	Observational_prop_of_time_vigilant		0	Control
SBWF019	0	0.0518248		1	Conflict
SBWF056	0	0.0144444
SBWM052	0	0.0367347
SHPF050	0	0.0294444
SGIM036	0	0.00333333
SGIF043	0	0
SSHM042	0	0.0125
SSGF010	0	0.0258333
SSHF029	0	0.0416667
SSHF043	0	0.128333
STSM010	0	0.00222222
STSM009	0	0.0261111
STSM004	0	0.015
SHPF053	0	0.0272222
SHPF041	0	0.0305556
SHPF049	0	0.0661111
SBWF019	1	0.0518072
SBWF056	1	0.0298013
SBWM052	1	0.0880952
SHPF050	1	0.0177778
SGIM036	1	0.03
SGIF043	1	0.0289474
SSHM042	1	0.257778
SSGF010	1	0.121667
SSHF029	1	0.0522222
SSHF043	1	0.125564
STSM010	1	0.0255556
STSM009	1	0.193333
STSM004	1	0.231111
SHPF053	1	0.0522222
SHPF041	1	0.166049
SHPF049	1	0.0966667

## Sheet: Figure 2b
Individual	Treatment	Experimental_mean_prop_time_vigilant
SSHF043	0	0.0171449
SHPF041	0	0.0338889
SBWF041	0	0.0102312
STSF008	0	0.00396918
SSGF006	0	0.0150641
SJBF037	0	0.00462963
SJBM043	0	0.0137037
SBWF056	0	0.00592593
SHPF053	0	0.00795974
SGIF043	0	0.0237963
SJBM052	0	0.0134615
SBWF019	0	0.00465608
SGIM036	0	0.0015873
SHPF050	0	0.00820191
SSHM042	0	0.00429739
SHPF049	0	0.00148148
SJBF049	0	0.00272872
SSHF043	1	0.0941667
SHPF041	1	0.111263
SBWF041	1	0.0513579
STSF008	1	0.0615937
SSGF006	1	0.0609503
SJBF037	1	0.0841805
SJBM043	1	0.0525092
SBWF056	1	0.0705556
SHPF053	1	0.0211111
SGIF043	1	0.180693
SJBM052	1	0.0135185
SBWF019	1	0.0794675
SGIM036	1	0.0377778
SHPF050	1	0.00375722
SSHM042	1	0.0600143
SHPF049	1	0.037963
SJBF049	1	0.037963
