# Supplementary material for: Experimental evidence for delayed post-conflict management behaviour in wild dwarf mongooses
Source: eLife. 2021 Nov 2;10:e69196. doi: 10.7554/eLife.69196 (PMC8562999; doi:10.7554/eLife.69196)
Supplement: Figure 4—source data 1. [file elife-69196-fig4-data1.xlsx]

## Sheet: Figure 4a
Group	Treatment	Prop_of_individuals_grooming		0	Control
SH_F	0	0.428571		1	Conflict
SH_F	1	0.714286
HP_F	0	1
HP_F	1	0.5
BW_M	0	1
BW_M	1	0.833333
TS_F	0	0.888889
TS_F	1	0.666667
JB_M	0	0.727273
JB_M	1	0.545455
GI_F	0	1
GI_F	1	0.888889
LB_F	0	1
LB_F	1	1
HP_M	0	1
HP_M	1	1

## Sheet: Figure 4b
ID	Treatment	Prop_of_time_grooming
SSHF029	1	0.135
SSHF043	1	0.0558333
SSHM031	1	0.139167
SSHM037	1	0.0166667
SSHM045	1	0.025
SSHF028	0	0.0851852
SSHF043	0	0.1
SSHM031	0	0.0148148
SHPF016	0	0.134028
SHPF031	0	0.146528
SHPF041	0	0.0291667
SHPF049	0	0.0895833
SHPF050	0	0.115278
SHPF053	0	0.130556
SHPM002	0	0.236111
SHPM012	0	0.0388889
SHPM038	0	0.0458333
SHPM039	0	0.154861
SHPM046	0	0.134028
SHPM052	0	0.0131944
SHPF041	1	0.0566667
SHPF049	1	0.176667
SHPF050	1	0.05
SHPM012	1	0.05
SHPM038	1	0.0566667
SHPM039	1	0.176667
SHPF016	1	0.266216
SHPF041	1	0.00765766
SHPF049	1	0.0509009
SHPF050	1	0.177027
SHPF053	1	0.123874
SHPM038	1	0.255405
SHPM046	1	0.0954955
SHPF016	0	0.284848
SHPF041	0	0.0287879
SHPF049	0	0.134848
SHPF050	0	0.120455
SHPF053	0	0.194697
SHPM038	0	0.312121
SHPM046	0	0.109848
SBWF007	1	0.311905
SBWF041	1	0.446429
SBWF056	1	0.075
SBWM052	1	0.386905
SHPM004	1	0.296429
SBWF007	0	0.151042
SBWF019	0	0.025
SBWF041	0	0.071875
SBWF056	0	0.05
SBWM052	0	0.104167
SHPM004	0	0.1125
STSF001	1	0.117857
STSF006	1	0.113095
STSM002	1	0.120238
STSM009	1	0.0928571
STSM010	1	0.0845238
STSM016	1	0.0666667
STSF001	0	0.210119
STSF006	0	0.0303571
STSF008	0	0.010119
STSM002	0	0.0815476
STSM004	0	0.010119
STSM009	0	0.194048
STSM010	0	0.129167
STSM016	0	0.052381
SJBF012	0	0.0378788
SJBF036	0	0.118182
SJBF037	0	0.0106061
SJBF045	0	0.0939394
SJBF049	0	0.0393939
SJBM038	0	0.0136364
SJBM043	0	0.0575758
SWEM003	0	0.186364
SJBF012	1	0.425
SJBF029	1	0.191667
SJBM038	1	0.0333333
SJBM052	1	0.0625
SWEM003	1	0.425
SWEM004	1	0.0958333
SGIF029	0	0.00888889
SGIF040	0	0.03
SGIF042	0	0.0322222
SGIF043	0	0.0366667
SGIM027	0	0.00666667
SGIM036	0	0.02
SGIM037	0	0.121111
SGIM041	0	0.03
SGIM053	0	0.0277778
SGIF029	1	0.127778
SGIF040	1	0.0986111
SGIF043	1	0.204167
SGIM027	1	0.0583333
SGIM036	1	0.0208333
SGIM037	1	0.1875
SGIM041	1	0.119444
SGIM053	1	0.130556
SBWF042	0	0.125
SSGF010	0	0.0694444
SSGM003	0	0.0416667
SSHM042	0	0.152778
SBWF042	1	0.433333
SSGF010	1	0.741667
SSGM003	1	0.433333
SSHM042	1	0.741667
