# Supplementary material for: Experimental evidence for delayed post-conflict management behaviour in wild dwarf mongooses
Source: eLife. 2021 Nov 2;10:e69196. doi: 10.7554/eLife.69196 (PMC8562999; doi:10.7554/eLife.69196)
Supplement: Figure 5—source data 1. [file elife-69196-fig5-data1.xlsx]

## Sheet: Figure 5a
ID	Treatment	Prop_time_subs_aggressor_groomed		0	Control
SH_F	0	0.851852		1	Conflict
SH_F	1	0
HP_F	0	0.181818
HP_F	1	0
HP_M	0	0.36802
HP_M	1	0.215979
BW_M	0	0.315789
BW_M	1	0.0706436
TS_F	0	0.446103
TS_F	1	0.396
JB_M	0	0.532609
JB_M	1	0
GI_F	0	0.148936
GI_F	1	0.0997067
LB_F	0	0.428571
LB_F	1	0

## Sheet: Figure 5b
ID	Treatment	Prop_time_subs_non_playback_dom_groomed
SH_F	0	0.148148
SH_F	1	0.713675
HP_F	0	0.342826
HP_F	1	0
HP_M	0	0.336294
HP_M	1	0.217735
BW_M	0	0.465587
BW_M	1	0.0910518
TS_F	0	0.0878939
TS_F	1	0.404
JB_M	0	0
JB_M	1	0
GI_F	0	0
GI_F	1	0.0146628
LB_F	0	0
LB_F	1	0

## Sheet: Figure 5c
ID	Treatment	Prop_of_subs_grooming_aggressor
SH_F	0	0.2
SH_F	1	0
HP_F	0	0.2
HP_F	1	0
HP_M	0	0.8
HP_M	1	0.4
BW_M	0	0.5
BW_M	1	0.25
TS_F	0	0.285714
TS_F	1	0.285714
JB_M	0	0.333333
JB_M	1	0
GI_F	0	0.142857
GI_F	1	0.285714
LB_F	0	0.5
LB_F	1	0

## Sheet: Figure 5d
ID	Treatment	Prop_of_subs_grooming_non_playback_dom
SH_F	0	0.2
SH_F	1	0.4
HP_F	0	0.6
HP_F	1	0
HP_M	0	0.8
HP_M	1	0.8
BW_M	0	0.5
BW_M	1	0.25
TS_F	0	0.285714
TS_F	1	0.142857
JB_M	0	0
JB_M	1	0
GI_F	0	0
GI_F	1	0.142857
LB_F	0	0
LB_F	1	0
