# Supplementary material for: Experimental evidence for delayed post-conflict management behaviour in wild dwarf mongooses
Source: eLife. 2021 Nov 2;10:e69196. doi: 10.7554/eLife.69196 (PMC8562999; doi:10.7554/eLife.69196)
Supplement: Figure 6—source data 1. [file elife-69196-fig6-data1.xlsx]

## Sheet: Figure 6a
ID	Treatment	Mean_grooming_bout_duration_subs		0	Control
HP_F	0	20.35		1	Conflict
HP_F	1	21.25
HP_M	0	19.7143
HP_M	1	35.75
BW_M	0	24
BW_M	1	55
TS_F	0	19.7
TS_F	1	50
JB_M	0	10.1667
JB_M	1	15.3333
GI_F	0	16.2857
GI_F	1	30
LB_F	0	25
LB_F	1	89

## Sheet: Figure 6b
ID	Treatment	Prop_time_target_subs_groomed
SH_F	0	0
SH_F	1	0
HP_F	0	0.202629
HP_F	1	0
HP_M	0	0.101523
HP_M	1	0.167691
BW_M	0	0
BW_M	1	0.510204
TS_F	0	0
TS_F	1	0
JB_M	0	0
JB_M	1	0.155405
GI_F	0	0.0567376
GI_F	1	0.269795
LB_F	0	0.357143
LB_F	1	0.631206

## Sheet: Figure 6c
ID	Treatment	Prop_time_subs_non_target_subs_groomed
SH_F	0	0
SH_F	1	0.192308
HP_F	0	0
HP_F	1	0.623529
HP_M	0	0.0799492
HP_M	1	0.148376
BW_M	0	0.097166
BW_M	1	0.00784929
TS_F	0	0.0845771
TS_F	1	0
JB_M	0	0.206522
JB_M	1	0
GI_F	0	0.205674
GI_F	1	0
LB_F	0	0.357143
LB_F	1	0.631206
