# Supplementary material for: Experimental evidence for delayed post-conflict management behaviour in wild dwarf mongooses
Source: eLife. 2021 Nov 2;10:e69196. doi: 10.7554/eLife.69196 (PMC8562999; doi:10.7554/eLife.69196)
Supplement: Source data 1. [file elife-69196-supp1.xlsx]

## Sheet: Observational
Prop_time_vig_control	Prop_time_vig_conflict
0.0518248	0.0518072
0.0144444	0.0298013
0.0367347	0.0880952
0.0294444	0.0177778
0.00333333	0.03
0.0125	0.257778
0.0258333	0.121667
0.0416667	0.0522222
0.128333	0.125564
0.00222222	0.0255556
0.0261111	0.193333
0.015	0.231111
0.0272222	0.0522222
0.0305556	0.166049
0.0661111	0.0966667
0	0.0289474

## Sheet: Exp 1
Mean_prop_time_vig_control	Mean_prop_time_vig_conflict
0.0171449	0.0941667
0.0338889	0.111263
0.0102312	0.0513579
0.00396918	0.0615937
0.0150641	0.0609503
0.00462963	0.0841805
0.0137037	0.0525092
0.00592593	0.0705556
0.00795974	0.0211111
0.0237963	0.180693
0.0134615	0.0135185
0.00465608	0.0794675
0.0015873	0.0377778
0.00820191	0.00375723
0.00429739	0.0600143
0.00148148	0.037963
0.00272872	0.037963

## Sheet: Exp 2_GLMM_grooming likelihood
GROUP	TREATMENT	INDIVIDUAL	GROOM
SH_F	CONFLICT	SSHF029	YES
SH_F	CONFLICT	SSHF043	YES
SH_F	CONFLICT	SSHM031	YES
SH_F	CONFLICT	SSHM037	YES
SH_F	CONFLICT	SSHM045	YES
SH_F	CONFLICT	SSHF028	NO
SH_F	CONFLICT	SSHM042	NO
SH_F	CONTROL	SSHF028	YES
SH_F	CONTROL	SSHF043	YES
SH_F	CONTROL	SSHM031	YES
SH_F	CONTROL	SSHF029	NO
SH_F	CONTROL	SSHM037	NO
SH_F	CONTROL	SSHM045	NO
SH_F	CONTROL	SSHM042	NO
HP_F	CONTROL	SHPF016	YES
HP_F	CONTROL	SHPF031	YES
HP_F	CONTROL	SHPF041	YES
HP_F	CONTROL	SHPF049	YES
HP_F	CONTROL	SHPF050	YES
HP_F	CONTROL	SHPF053	YES
HP_F	CONTROL	SHPM002	YES
HP_F	CONTROL	SHPM012	YES
HP_F	CONTROL	SHPM038	YES
HP_F	CONTROL	SHPM039	YES
HP_F	CONTROL	SHPM046	YES
HP_F	CONTROL	SHPM052	YES
HP_F	CONFLICT	SHPF041	YES
HP_F	CONFLICT	SHPF049	YES
HP_F	CONFLICT	SHPF050	YES
HP_F	CONFLICT	SHPM012	YES
HP_F	CONFLICT	SHPM038	YES
HP_F	CONFLICT	SHPM039	YES
HP_F	CONFLICT	SHPF016	NO
HP_F	CONFLICT	SHPF031	NO
HP_F	CONFLICT	SHPF053	NO
HP_F	CONFLICT	SHPM002	NO
HP_F	CONFLICT	SHPM046	NO
HP_F	CONFLICT	SHPM052	NO
BW_M	CONFLICT	SBWF007	YES
BW_M	CONFLICT	SBWF041	YES
BW_M	CONFLICT	SBWF056	YES
BW_M	CONFLICT	SBWM052	YES
BW_M	CONFLICT	SHPM004	YES
BW_M	CONFLICT	SBWF019	NO
BW_M	CONTROL	SBWF007	YES
BW_M	CONTROL	SBWF019	YES
BW_M	CONTROL	SBWF041	YES
BW_M	CONTROL	SBWF056	YES
BW_M	CONTROL	SBWM052	YES
BW_M	CONTROL	SHPM004	YES
TS_F	CONFLICT	STSF001	YES
TS_F	CONFLICT	STSF006	YES
TS_F	CONFLICT	STSM002	YES
TS_F	CONFLICT	STSM009	YES
TS_F	CONFLICT	STSM010	YES
TS_F	CONFLICT	STSM016	YES
TS_F	CONFLICT	STSM004	NO
TS_F	CONFLICT	STSF005	NO
TS_F	CONFLICT	STSF008	NO
TS_F	CONTROL	STSF001	YES
TS_F	CONTROL	STSF006	YES
TS_F	CONTROL	STSF008	YES
TS_F	CONTROL	STSM002	YES
TS_F	CONTROL	STSM004	YES
TS_F	CONTROL	STSM009	YES
TS_F	CONTROL	STSM010	YES
TS_F	CONTROL	STSM016	YES
TS_F	CONTROL	STSF005	NO
JB_M	CONTROL	SJBF012	YES
JB_M	CONTROL	SJBF036	YES
JB_M	CONTROL	SJBF037	YES
JB_M	CONTROL	SJBF045	YES
JB_M	CONTROL	SJBF049	YES
JB_M	CONTROL	SJBM038	YES
JB_M	CONTROL	SJBM043	YES
JB_M	CONTROL	SWEM003	YES
JB_M	CONTROL	SWEM004	NO
JB_M	CONTROL	SJBM052	NO
JB_M	CONTROL	SJBF029	NO
JB_M	CONFLICT	SJBF012	YES
JB_M	CONFLICT	SJBF029	YES
JB_M	CONFLICT	SJBM038	YES
JB_M	CONFLICT	SJBM052	YES
JB_M	CONFLICT	SWEM003	YES
JB_M	CONFLICT	SWEM004	YES
JB_M	CONFLICT	SJBF036	NO
JB_M	CONFLICT	SJBF037	NO
JB_M	CONFLICT	SJBM043	NO
JB_M	CONFLICT	SJBF045	NO
JB_M	CONFLICT	SJBF049	NO
GI_F	CONTROL	SGIF029	YES
GI_F	CONTROL	SGIF040	YES
GI_F	CONTROL	SGIF042	YES
GI_F	CONTROL	SGIF043	YES
GI_F	CONTROL	SGIM027	YES
GI_F	CONTROL	SGIM036	YES
GI_F	CONTROL	SGIM037	YES
GI_F	CONTROL	SGIM041	YES
GI_F	CONTROL	SGIM053	YES
GI_F	CONFLICT	SGIF029	YES
GI_F	CONFLICT	SGIF040	YES
GI_F	CONFLICT	SGIF043	YES
GI_F	CONFLICT	SGIM027	YES
GI_F	CONFLICT	SGIM036	YES
GI_F	CONFLICT	SGIM037	YES
GI_F	CONFLICT	SGIM041	YES
GI_F	CONFLICT	SGIM053	YES
GI_F	CONFLICT	SGIF042	NO
LB_F	CONTROL	SBWF042	YES
LB_F	CONTROL	SSGF010	YES
LB_F	CONTROL	SSGM003	YES
LB_F	CONTROL	SSHM042	YES
LB_F	CONFLICT	SBWF042	YES
LB_F	CONFLICT	SSGF010	YES
LB_F	CONFLICT	SSGM003	YES
LB_F	CONFLICT	SSHM042	YES
HP_M	CONFLICT	SHPF016	YES
HP_M	CONFLICT	SHPF041	YES
HP_M	CONFLICT	SHPF049	YES
HP_M	CONFLICT	SHPF050	YES
HP_M	CONFLICT	SHPF053	YES
HP_M	CONFLICT	SHPM038	YES
HP_M	CONFLICT	SHPM046	YES
HP_M	CONTROL	SHPF016	YES
HP_M	CONTROL	SHPF041	YES
HP_M	CONTROL	SHPF049	YES
HP_M	CONTROL	SHPF050	YES
HP_M	CONTROL	SHPF053	YES
HP_M	CONTROL	SHPM038	YES
HP_M	CONTROL	SHPM046	YES

## Sheet: Exp 2_GLMMs and LMM
GROUP	TREATMENT	INDIVIDUAL	GR_FREQ	DURATION	AVERAGE_GR_BOUT_DUR	PROP_TIME_GROOMING
SH_F	CONFLICT	SSHF029	5	20	32.4	0.135
SH_F	CONFLICT	SSHF043	4	20	16.75	0.0558333
SH_F	CONFLICT	SSHM031	6	20	27.8333	0.139167
SH_F	CONFLICT	SSHM037	2	20	10	0.0166667
SH_F	CONFLICT	SSHM045	2	20	15	0.025
SH_F	CONTROL	SSHF028	2	18	46	0.0851852
SH_F	CONTROL	SSHF043	3	18	36	0.1
SH_F	CONTROL	SSHM031	1	18	16	0.0148148
HP_F	CONTROL	SHPF016	5	24	38.6	0.134028
HP_F	CONTROL	SHPF031	12	24	17.5833	0.146528
HP_F	CONTROL	SHPF041	3	24	14	0.0291667
HP_F	CONTROL	SHPF049	2	24	64.5	0.0895833
HP_F	CONTROL	SHPF050	4	24	41.5	0.115278
HP_F	CONTROL	SHPF053	9	24	20.8889	0.130556
HP_F	CONTROL	SHPM002	12	24	28.3333	0.236111
HP_F	CONTROL	SHPM012	4	24	14	0.0388889
HP_F	CONTROL	SHPM038	4	24	16.5	0.0458333
HP_F	CONTROL	SHPM039	7	24	31.8571	0.154861
HP_F	CONTROL	SHPM046	7	24	27.5714	0.134028
HP_F	CONTROL	SHPM052	1	24	19	0.0131944
HP_F	CONFLICT	SHPF041	1	5	17	0.0566667
HP_F	CONFLICT	SHPF049	2	5	26.5	0.176667
HP_F	CONFLICT	SHPF050	1	5	15	0.05
HP_F	CONFLICT	SHPM012	1	5	15	0.05
HP_F	CONFLICT	SHPM038	1	5	17	0.0566667
HP_F	CONFLICT	SHPM039	2	5	26.5	0.176667
HP_M	CONFLICT	SHPF016	23	37	25.6957	0.266216
HP_M	CONFLICT	SHPF041	1	37	17	0.00765766
HP_M	CONFLICT	SHPF049	3	37	37.6667	0.0509009
HP_M	CONFLICT	SHPF050	16	37	24.5625	0.177027
HP_M	CONFLICT	SHPF053	8	37	34.375	0.123874
HP_M	CONFLICT	SHPM038	22	37	25.7727	0.255405
HP_M	CONFLICT	SHPM046	7	37	35.3333	0.0954955
HP_M	CONTROL	SHPF016	10	22	37.6	0.284848
HP_M	CONTROL	SHPF041	3	22	12.6667	0.0287879
HP_M	CONTROL	SHPF049	4	22	44.5	0.134848
HP_M	CONTROL	SHPF050	5	22	31.8	0.120455
HP_M	CONTROL	SHPF053	11	22	23.3636	0.194697
HP_M	CONTROL	SHPM038	15	22	27.4667	0.312121
HP_M	CONTROL	SHPM046	5	22	29	0.109848
BW_M	CONFLICT	SBWF007	8	14	32.75	0.311905
BW_M	CONFLICT	SBWF041	8	14	46.875	0.446429
BW_M	CONFLICT	SBWF056	2	14	31.5	0.075
BW_M	CONFLICT	SBWM052	5	14	65	0.386905
BW_M	CONFLICT	SHPM004	9	14	27.6667	0.296429
BW_M	CONTROL	SBWF007	4	16	36.25	0.151042
BW_M	CONTROL	SBWF019	1	16	24	0.025
BW_M	CONTROL	SBWF041	3	16	23	0.071875
BW_M	CONTROL	SBWF056	3	16	16	0.05
BW_M	CONTROL	SBWM052	2	16	50	0.104167
BW_M	CONTROL	SHPM004	5	16	21.6	0.1125
TS_F	CONFLICT	STSF001	3	14	33	0.117857
TS_F	CONFLICT	STSF006	3	14	31.6667	0.113095
TS_F	CONFLICT	STSM002	4	14	25.25	0.120238
TS_F	CONFLICT	STSM009	2	14	39	0.0928571
TS_F	CONFLICT	STSM010	2	14	35.5	0.0845238
TS_F	CONFLICT	STSM016	2	14	28	0.0666667
TS_F	CONTROL	STSF001	7	28	50.4286	0.210119
TS_F	CONTROL	STSF006	3	28	17	0.0303571
TS_F	CONTROL	STSF008	1	28	17	0.010119
TS_F	CONTROL	STSM002	7	28	19.5714	0.0815476
TS_F	CONTROL	STSM004	1	28	17	0.010119
TS_F	CONTROL	STSM009	10	28	32.6	0.194048
TS_F	CONTROL	STSM010	12	28	18.0833	0.129167
TS_F	CONTROL	STSM016	1	28	88	0.052381
JB_M	CONTROL	SJBF012	1	11	25	0.0378788
JB_M	CONTROL	SJBF036	4	11	19.5	0.118182
JB_M	CONTROL	SJBF037	1	11	7	0.0106061
JB_M	CONTROL	SJBF045	4	11	15.5	0.0939394
JB_M	CONTROL	SJBF049	2	11	13	0.0393939
JB_M	CONTROL	SJBM038	1	11	9	0.0136364
JB_M	CONTROL	SJBM043	3	11	12.6667	0.0575758
JB_M	CONTROL	SWEM003	4	11	30.75	0.186364
JB_M	CONFLICT	SJBF012	3	4	34	0.425
JB_M	CONFLICT	SJBF029	3	4	15.3333	0.191667
JB_M	CONFLICT	SJBM038	1	4	8	0.0333333
JB_M	CONFLICT	SJBM052	1	4	15	0.0625
JB_M	CONFLICT	SWEM003	3	4	34	0.425
JB_M	CONFLICT	SWEM004	1	4	23	0.0958333
GI_F	CONTROL	SGIF029	1	15	8	0.00888889
GI_F	CONTROL	SGIF040	2	15	13.5	0.03
GI_F	CONTROL	SGIF042	1	15	29	0.0322222
GI_F	CONTROL	SGIF043	2	15	16.5	0.0366667
GI_F	CONTROL	SGIM027	1	15	6	0.00666667
GI_F	CONTROL	SGIM036	1	15	18	0.02
GI_F	CONTROL	SGIM037	6	15	18.1667	0.121111
GI_F	CONTROL	SGIM041	2	15	13.5	0.03
GI_F	CONTROL	SGIM053	2	15	12.5	0.0277778
GI_F	CONFLICT	SGIF029	3	12	30.6667	0.127778
GI_F	CONFLICT	SGIF040	6	12	11.8333	0.0986111
GI_F	CONFLICT	SGIF043	5	12	29.4	0.204167
GI_F	CONFLICT	SGIM027	4	12	10.5	0.0583333
GI_F	CONFLICT	SGIM036	1	12	15	0.0208333
GI_F	CONFLICT	SGIM037	5	12	27	0.1875
GI_F	CONFLICT	SGIM041	4	12	21.5	0.119444
GI_F	CONFLICT	SGIM053	2	12	47	0.130556
LB_F	CONTROL	SBWF042	2	6	22.5	0.125
LB_F	CONTROL	SSGF010	1	6	25	0.0694444
LB_F	CONTROL	SSGM003	1	6	15	0.0416667
LB_F	CONTROL	SSHM042	2	6	27.5	0.152778
LB_F	CONFLICT	SBWF042	2	2	26	0.433333
LB_F	CONFLICT	SSGF010	1	2	89	0.741667
LB_F	CONFLICT	SSGM003	2	2	26	0.433333
LB_F	CONFLICT	SSHM042	1	2	89	0.741667

## Sheet: Exp 2_aggressor_wilcoxons
Prop_time_subs_doms_groomed_control	Prop_time_subs_doms_groomed_conflict	Prop_time_subs_agg_groomed_control	Prop_time_subs_agg_groomed_conflict	Prop_time_subs_non_playback_dom_groomed_control	Prop_time_subs_non_playback_dom_groomed_conflict	Prop_subs_agg_grooms_control	Prop_subs_agg_grooms_contflict	Prop_subs_non_playback_dom_grooms_control	Prop_subs_non_playback_dom_grooms_conflict
1	0.713675	0.851852	0	0.148148	0.713675	0.2	0	0.2	0.4
0.524644	0	0.181818	0	0.342826	0	0.2	0	0.6	0
0.704315	0.433714	0.36802	0.215979	0.336294	0.217735	0.8	0.4	0.8	0.8
0.781377	0.161695	0.315789	0.0706436	0.465587	0.0910518	0.5	0.25	0.5	0.25
0.533997	0.8	0.446103	0.396	0.0878939	0.404	0.285714	0.285714	0.285714	0.142857
0.532609	0	0.532609	0	0	0	0.333333	0	0	0
0.148936	0.11437	0.148936	0.0997067	0	0.0146628	0.142857	0.285714	0	0.142857
0.428571	0	0.428571	0	0	0	0.5	0	0	0

## Sheet: Exp 2_target_wilcoxons
Prop_time_subs_groomed_control	Prop_time_subs_groomed_conflict	Subs_mean_gr_dur_control	Subs_mean_gr_dur_conflict	Prop_time_target_subs_groomed_control	Prop_time_target_subs_groomed_conflict	Prop_time_subs_non_playback_sub_groomed_control	Prop_time_subs_non_playback_sub_groomed_conflict
0	0.192308	20.35	21.25	0	0	0	0.192308
0.445783	1	19.7143	35.75	0.202629	0	0	0.623529
0.175127	0.251097	24	55	0.101523	0.167691	0.0799492	0.148376
0.097166	0.518053	19.7	50	0	0.510204	0.097166	0.00784929
0.3267	0.2	10.1667	15.3333	0	0	0.0845771	0
0.331522	0.310811	16.2857	30	0	0.155405	0.206522	0
0.808511	0.791789	25	89	0.0567376	0.269795	0.205674	0
0.357143	0.631206			0.357143	0.631206	0.357143	0.631206
